# What if I had a third arm? An EEG study of a supernumerary BCI system

Jaime A. Riascos<sup>a,b,c</sup>, David Steeven Villa<sup>c,d</sup>, Anderson Maciel<sup>c</sup>, Luciana Nedel<sup>c</sup>, Dante Barone<sup>c</sup>

*Porto Alegre, Brazil.*

<sup>a</sup>*Autonomous University Corporation of Nariño - Pasto, Colombia.*

<sup>b</sup>*SDAS - Research Group.*

<sup>c</sup>*Institute of Informatics - Federal University Rio Grande do Sul (UFRGS) - Porto Alegre, Brazil.*

<sup>d</sup>*Ludwig-Maximilians-Universität München (LMU Munich) - Munich, Germany.*

---

## Abstract

Motor imagery Brain-Computer Interface (MI-BCI) enables bodyless communication by means of the imagination of body movements. Since its apparition, MI-BCI has been widely used in applications such as guiding a robotic prosthesis, or the navigation in games and virtual reality (VR) environments. Although psychological experiments, such as the Rubber Hand Illusion - RHI, suggest the human ability for creating body transfer illusions, MI-BCI only uses the imagination of real body parts as neurofeedback training and control commands. The present work studies and explores the inclusion of an imaginary third arm as a part of the control commands for MI-BCI systems. It also compares the effectiveness of using the conventional arrows and fixation cross as training step (*Graz* condition) against realistic human hands performing the corresponding tasks from a first-person perspective (*Hands* condition); both conditions wearing a VR headset. Ten healthy subjects participated in a two-session EEG experiment involving open-close hand tasks, including a third arm that comes out from the chest. The EEG analysis shows a strong power decrease in the sensory-motor areas for the third arm task in both training conditions. Such activity is significantly stronger for *Hands* than *Graz* condition, suggesting that the realistic scenario can reduce the abstractness of the third arm and improve the generation of motor

---

\*Corresponding author: [jarsalas@inf.ufrgs.br](mailto:jarsalas@inf.ufrgs.br)

imagery signals. The cognitive load is also assessed both by NASA-TLX and Task Load index.

*Keywords:* Motor Imagery, Brain-Computer Interface, Rubber-Hand Illusion, Embodied Cognition.

---

## 1. Introduction

The primary purpose of Human-Computer Interaction (HCI) is seeking new alternatives for communicating humans and machines, and this effort is more evident when users with motor disabilities show difficulties using standard interfaces [1]. Brain-Computer Interface (BCI) is the technology that enables bodyless communication with machines or devices; this is done using the translation of brain signals into command outputs [2].

BCI commonly employs the electrical activity in the brain (EEG) elicited during a specific task. Depending on the nature of this activity, BCI is characterized as passive, active or reactive [3]. Passive systems use signals that arise without voluntary control. It is used fundamentally to assess mental states and enhance the human-computer interaction [4]. Active BCI works with the self-induced brain activity produced by the user independently of external events. It has been used as a control signal [5]. Finally, reactive BCI relies on the signals elicited by the reaction to specific external stimuli, which could be used to control an application as well [6].

Since the activation patterns of imaginary body movements involves both brain regions (sensory and motor areas) and neural mechanisms similar to the executed movement [7], the Motor Imagery BCI (MI-BCI) has been widely used and explored in active BCI [8]. MI-BCI employs the amplitude changes voluntarily elicited by the mental rehearsal of physical motor actions. Such variations are known as event-related de-synchronization and synchronization (ERD/ERS). These patterns have been successfully used for studying the neural mechanisms associated with motor actions, as well as a feature for classification in motor-related BCI systems [9, 8, 10, 1].

Despite BCI being a promising and useful application, there are still several challenges to be addressed. Chavarriaga et al. [11] discuss concrete research avenues and guidelines to overcome common pitfalls in BCI. Their paper is the outcome of a meeting held at the workshop “What’s wrong with us? Roadblocks and pitfalls in designing BCI applications”. They summarize four main topics that influence any closed-loop BCI system:

- 32 *a) **Signal processing and decoding:*** the signal processing of EEG data,  
33 and consequently BCI systems, is boosted by the fast growth of machine  
34 learning and unsupervised systems (i.e., deep learning) [12].
- 35 *b) **End Users:*** the creation of objective either questionnaires or pre-  
36 tests to identify potential user should be considered prior to a BCI  
37 implementation.
- 38 *c) **Performance metrics and reporting:*** BCI's metrics are a topic un-  
39 der discussion [13] since the classification accuracy is not enough for  
40 evaluating BCI systems, the creation of new metrics becomes funda-  
41 mental [14].
- 42 *d) **Feedback and user training:*** several efforts have been made in order  
43 to include the user inside the BCI loop [15], creating affordable and  
44 intuitive interfaces, considering human factors on their design.

45 In effect, immersive technologies have recently played an essential role in  
46 overcoming the feedback and user training challenge. Among them, Virtual  
47 Reality (VR) is one of the most promising technologies, giving the users a  
48 sensation of actual presence in virtual worlds. VR has been effectively used in  
49 several areas, from health-care for rehabilitation and training [16] up to data  
50 visualization and serious games [17, 18]. Likewise, VR has been used in BCI  
51 for a visual presentation feedback of the current task carried out by the user.  
52 Lécuyer et al. [19] discuss some of the current applications developed using  
53 BCI with VR, namely MindBalance [20], Simulation of wheelchair control  
54 [21], and “use the force” [22]. These studies, as highlighted by the authors,  
55 show the successful use of VR with BCI.

56 Another important thing about MI-BCI applications is that, so far, they  
57 have essentially used attached body parts. In other words, MI-BCI focuses  
58 on mental representations of jointed limbs following the human anatomy  
59 constraints (e.g., two arms, two legs, two feet, in a symmetrical distribution).  
60 To the authors' knowledge, nevertheless, there are neither explorations nor  
61 applications that include non-embodied human limbs in BCI systems, even  
62 though Rubber Hand Illusion (RHI) experiments demonstrated the human  
63 capabilities to create body transfer illusions [23, 24]. Indeed, RHI does not  
64 only demonstrate a static body illusion representation (sense of ownership),  
65 but also an active movement eliciting a body illusion (sense of agency) [25].

66 In that vein, this paper presents the complementary results regarding the  
67 inclusion of a third arm as a control command in a BCI system: an EEG anal-  
68 ysis of the induced brain oscillatory activity elicited by the third arm using  
69 Event-Related Spectral Perturbation (ERSP). A preliminary study addressed  
70 an offline exploration of the classification of the third arm task [26]. Contin-  
71 uing with that study, throughout this research, we compared the approach  
72 under two training conditions: the conventional Graz paradigm (cross and  
73 arrows) and immersive human-like feedback. Moreover, we included a cog-  
74 nitive load assessment by both the subjective questionnaire (NASA-TLX)  
75 [27] and the Task Load Index using EEG data [28]. Finally, we used the  
76 Movement Imagery Questionnaire - 3 (MIQ - 3) [29] before the experiment  
77 to assess the movement imagery ability of the users. The findings suggest  
78 that ERS/ERD patterns are elicited by the virtual third arm. Moreover,  
79 in line with the literature, the realistic training enhances the modulation of  
80 such patterns but creating an additional cognitive load (presumably caused  
81 by the visual processing).

82 The remainder of this paper is structured as follows: section 2 presents  
83 the state-of-art in BCI, applications that use either VR or body illusions.  
84 Then, section 3 shows the materials, methods, and details of the experimental  
85 procedure. Finally, section 4 provides the main findings that are discussed  
86 in section 5, and section 6 presents the concluding remarks.

## 87 2. Related Works

88 Virtual Reality is a powerful tool to improve the BCI training and en-  
89 hancing the feedback experiences [30]. The learning task should include an  
90 intuitive feedback so that the users can easily understand the action to be  
91 executed and improve their performance. However, it is currently hard to  
92 choose the right feedback presentation, and it should be a motivating and  
93 engaging environment [11], besides being natural and realistic. Here, VR can  
94 be shown as a real alternative for tackling the feedback presentation issue.

95 Lotte et al. [31] show how combining BCI with VR can carry towards  
96 a new and improved BCI system. Nevertheless, such VR feedback can also  
97 introduce some interference to the motor imagery-related brain activity used  
98 by the BCI because both  $\mu$  and  $\beta$  bands are reactive in motor imagery and  
99 observation of the real movement [9]. An interesting study carried out by  
100 Neuper et al. [32] explores the influence of different types of visual feedback  
101 in the modulation of the EEG signal during the BCI control. Using a video

102 to show a first-person view of an object-directed grasping movement, they  
103 were able to found modulation activity in sensorimotor rhythms caused by  
104 this real feedback stimulus. They highlight the importance of the amount of  
105 information provided by this condition in order to reduce the reactive bands.

106 Ron-Angevin and Diaz-Estrella [33] made a first comparison between  
107 the screen condition (Graz) and VR in a BCI scenario, focusing on the  
108 performance (classification rates). They successfully found improvements  
109 in the feedback control of the VR condition in untrained subjects. How-  
110 ever, they used car navigation as a task, which can be seen as unnatural  
111 and abstract when compared to an embodied experience. The studies cited  
112 above have used different feedback stimuli, but none of them has used a  
113 virtual human avatar, which could be useful for the training step. Re-  
114 cently, Skola and Liarnokapis [34] addressed such problem comparing the  
115 Graz paradigm against a human-like avatar performing the user's motor ac-  
116 tions synchronously. The authors report improvements in both ERD/ERS  
117 modulation and classification rates by the neurofeedback-guided motor im-  
118 agery training. Likewise, Braun et al. [35] report the same sort of results  
119 using an anthropomorphic robotic hand as a visual guide. Also, they found  
120 differences between the two conditions in the electrodermal activity and sub-  
121 jective measures. Both works reported that they were inspired by the RHI.  
122 They also include within their discussions, the analysis of sense of owner-  
123 ship, agency, and self-location towards the non-body object, concepts that  
124 are being recently taken into account in BCI research [36, 37].

125 Although, from the RHI theory, it is demonstrated that the body trans-  
126 fer illusion can be effectively used with non-attached limbs in both passive  
127 (presence) and active (movement) conditions [25]. Up to this point, supernu-  
128 merary limbs BCI system had not been approached. Bashford and Mehring  
129 [38] proposed this possibility with their work. They used an imaginary third  
130 arm for assessing the ownership and agency of a non-body limb in an imita-  
131 tion BCI (i.e. subjects think that their EEG activity is controlling the arm).  
132 Results show that there is independent ownership and control – based on the  
133 correct movements observed against the subject movements – of the third  
134 arm keeping the sense of ownership of the real hands. These findings suggest  
135 the capabilities of human of extrapolating limbs to execute motor actions.  
136 However, they did not study the use of this third arm as a control command  
137 inside the BCI loop. A recent work proposed by Song and King [39] demon-  
138 strates that using an RHI-based paradigm can significantly enhance the MI  
139 signals for BCI systems.

140 The paper’s contribution includes a step towards the creation of super-  
141 numerary MI-BCI systems. Here, we performed an EEG study of the user’s  
142 ability to imagine a third imaginary arm in a BCI paradigm. We also com-  
143 pared the effectiveness of using the conventional arrows and fixation cross  
144 as training step (*Graz*) against a first-person view using a human avatar  
145 (*Hands*). Both training conditions were carried out in a VR environment.

### 146 3. Materials and Methods

#### 147 3.1. Overview

148 An offline MI-BCI experiment, which uses EEG for recording the data  
149 and VR scenarios for presenting the stimulus, was conducted in a reduced  
150 noise room. The experiment’s aim is to study the feasibility of including a  
151 virtual third arm in a MI-BCI system while the traditional training paradigm  
152 (*Graz*) is compared against a first-person view using a human avatar. There  
153 were two recording sessions with two runs in each one with a resting time  
154 between them. The sessions were conducted on two separate days within one  
155 week. Only on the first day, the participants had to fill up three question-  
156 naires: MIQ-3, demographics and Edinburgh Handedness. Likewise, after  
157 each session, participants filled the NASA-TLX form.

#### 158 3.2. Participants

159 Ten right-handed volunteers (four women) participated in the study. Par-  
160 ticipant ages were within 18 and 34 years old with a mean of 23. All par-  
161 ticipants had basic informatics knowledge. Only 30% did not have previous  
162 experience with VR and no one had any previous experience in MI-BCI. No  
163 one had problems with head movements. Half of the population had visual  
164 impairments (mainly myopia and astigmatism) and used glasses to reduce  
165 them. The experiment was conducted in accordance with the Declaration  
166 of Helsinki. Participants were informed both oral and writerly about the  
167 procedure and the EEG recording. All participants gave written informed  
168 consent.

#### 169 3.3. VR Scenarios

170 For the VR exposition, we used a head-mounted display (HMD) Oculus  
171 Rift CV1 with a resolution of 2160 x 1200 (1080 x 1200 per eye), refresh rate  
172 of 90 Hz, a 110° field of view, and both rotational and positional tracking  
173 to render the immersive scene. We used the popular game engine Unity3D

174 to develop the immersive scene that was intended to assist the users when  
175 imagining and performing motor actions with their left and right real arms  
176 and the middle imaginary one (see the top of Figure 1).

177 There was a special focus on the realism of the models: left and right  
178 hands were placed matching with the rest positions of the real hands. A  
179 third hand was placed in the middle of the body, like emerging from the  
180 chest trying to avoid visual relations with the left or the right arm. The  
181 fingers on the third arm also were modified to be symmetric. In this sense,  
182 since that the thumbs in either left and right hand can indicate to which arm  
183 it belongs, their were removed from the third arm. Thus, it is identified as  
184 an independent arm and not a copy or extension of the existing arms. High-  
185 quality textures were used with shaders designed to highlight generic skin  
186 details. Bones in each finger preserve the average human hand proportions.

### 187 3.4. *Experimental Procedure*

188 The subjects sat comfortably in an armchair and were asked to rest their  
189 arms in the armrests and avoid any other movements during the record-  
190 ings. Initially, the participants wore the HMD for getting into the scene and  
191 running several trials for learning the instructions previously read. After  
192 the training, we mounted the EEG cap followed by the traditional gelling  
193 process, and then we fit the HMD. We tried as much as possible to avoid  
194 that the HMD frame touches the EEG electrodes. Moreover, we checked the  
195 signal quality before and after mounting the HMD to detect any avoidable  
196 interference.

197 The experiment involves the execution of four different tasks in two ex-  
198 perimental conditions. The subjects were invited to rest (RS), or to move a  
199 specific hand: third hand (TH), left hand (LH), and right hand (RH). Con-  
200 ditions considered were *Graz*, and *Hands*. The *Hands* condition involved the  
201 presentation of a human-like avatar (see the top of Figure 2), whereas *Graz*  
202 the presentation of arrows (see the middle of Figure 2).

203 The two experimental conditions followed the timing protocol proposed  
204 by Pfurtscheller [9]. The users performed 20 trials of each task randomly  
205 selected (described below) with a duration of 7 seconds each (see the bottom  
206 of Figure 2). The main difference between the conditions lies in the visual  
207 feedback, as follows:

- 208 a) ***Graz condition***: starting with a gray screen (resting state), at time  
209 2s, a fixation cross at the center of the scene was displayed with a short

210 warning tone (‘beep’) which indicates to the user to pay attention to  
211 the incoming visual cue presented at time 3s. At time 4s, the user had  
212 to perform the motor task for three seconds. The color of the arrows  
213 indicates the task (red for execution and white for imagination) and  
214 the direction indicates if the hand should be either left or right. The  
215 third arm cue was an arrow pointing upwards (see the middle of Figure  
216 2).

217 *b) Hands condition:* at the start, the user’s hands were placed in the  
218 equivalent real arms positions (resting state), at time 2s, the same au-  
219 ditory cue starts indicating an incoming stimulus. Next at time 3s, a  
220 visual cue is introduced without animation to let the users to be pre-  
221 pared for the action they will perform. At time 4s, the animation is  
222 introduced, and the user must perform either the mechanic or imagi-  
223 nary operation. This state continues until the end of the task (three  
224 seconds more). As for the visual cues, the real skin shading represents  
225 actual open-close hand movements, while transparent shading repre-  
226 sents imaginary movements. Moreover, it is important to highlight  
227 that the third arm appears in the scene only when this specific trial is  
228 necessary. In other trials, there are just two visible hands (see the top  
229 of Figure 2).

230 Following [40], subjects were instructed to perform the kinesthetic ex-  
231 perience during the execution of motor imagery tasks, i.e., imagining the  
232 sensation of performing the motor tasks rather than the visual representa-  
233 tion of the movement. The authors suggest that kinesthetic motor imagery  
234 is essential to elicit sensorimotor patterns (ERD\S). Besides this, in order  
235 to avoid the carry-over bias, both experimental conditions were counterbal-  
236 anced across participants (i.e. five subjects start with *Hands* condition and  
237 the rest with *Graz*). Likewise, it is necessary to mention that the movement  
238 animations were applied directly to the bones always looking for a natural  
239 behavior of the hand. The animations are predefined, they are not based on  
240 the user’s EEG activity or motion.

241 Finally, in contrast to Skola and Liarnokapis [34] where the *Graz* condi-  
242 tion is presented in a monitor, we made comparisons of the *Graz* and *Hands*  
243 conditions in an immersive virtual environment. Therefore, the users have to  
244 wear the HMD in both conditions. The background of *Graz* scenario was set  
245 to gray, avoiding high contrast that could produce discomfort on the user’s  
246 eyes.



### 247 3.5. Data Acquisition

248 We collected the EEG data using an OpenBCI 32 bit board at a sampling  
249 rate of 250 Hz. Following the 10-20 EEG placement system, eight passive gold  
250 cup electrodes were used and placed at sensorimotor cortex (see the bottom  
251 of Figure 1), namely, frontal (F3, Fz, F4) central (C3, Cz, C4), and parietal  
252 (P4, P3) cortices. Left and right mastoids were used as reference and ground  
253 electrodes respectively. Labstreaminglayer (LSL) is used for recording and  
254 synchronizing the EEG data with the Unity trials through LSL4Unity (a  
255 third party software) [41].

### 256 3.6. EEG signal processing

257 We used EEGLAB (14.1) [42] (under Matlab 2017b) for processing the  
258 .XDF file created by LSL. Following the usual procedure for analysis motor-  
259 imagery-related EEG patterns (sensorimotor rhythms) [43], we initially down-  
260 sampled the signals at 115 Hz and band-passed at 1-35Hz using a finite im-  
261 pulse response (FIR) filter. Later, we used the Cleanline plugin at 50-115  
262 Hz instead of a notch filter to avoid band-holes, and distortions at the cutoff  
263 frequency. Likewise, we rejected bad channels (excluding the sensorimotor  
264 ones) using Cleanraw plugin. The rejected channels were then interpolated  
265 using a spherical function. Finally, we used the common average reference  
266 (CAR).

### 267 3.7. Event-related spectral perturbation

268 The event-related spectral perturbation (ERSP) is a generalization of the  
269 ERD/ERS patterns. ERSP computes the changes of the spectral powers  
270 in time-frequency domains, relative to the stimuli [44]. Thus, with this ap-  
271 proach, the changes of the EEG signals elicited by motor imagery events can  
272 be detected alongside of the spectral band and epoch. ERSP values were  
273 computed for every mental task (TH, LH, RH, RS) in *Graz* and *Hands* con-  
274 ditions using the *newtime* function of the toolbox in the filtered data. We  
275 used a time window of -500 ms to 2500 ms, displayed between 5 Hz and 30 Hz;  
276 Also, significant alpha was setup to 0.05. The sensorimotor area composed  
277 by the electrodes C3, Cz and C4 were used to display the time-frequency  
278 ERD/ERS maps (Figures 3 and 4).

### 279 3.8. Task Load Index

280 Besides the subjective assessment of the cognitive load by the NASA-  
281 TLX [27], we also used the Task Load Index (*TLI*) developed by Alan Gevins

282 and Michael E. Smith [28] in order to have an objective measure of the task  
283 load. The authors found that the power changes of  $\theta$  at frontal mid-line sites  
284 and  $\alpha$  at parietal sites are related to the task load associated to the mental  
285 effort required for task performance. Thus, this index can be measured by  
286 the ratio of  $\theta$  to  $\alpha$ . In this work, we used the *spectopo* function to calculate  
287 the average of the absolute power of frontal mid-line (F3, Fz, F4)  $\theta$  and  
288 parietal (P3-P4 plus Cz)  $\alpha$  to assess the mental tasks per condition (*Graz*  
289 and *Hands*) as follows:

$$TLI = \frac{\mu(\alpha_{F3,Fz,F4})}{\mu(\theta_{P3,Cz,P4})} \quad (1)$$

290

### 291 3.9. MIQ-3

292 Despite Motor Imagery is a fundamental constructor of any healthy per-  
293 son, i.e., that all humans should have the capacity of imagining and planning  
294 motor activities, some people could face limitations to perform imaginary  
295 activities. In such vein, several questionnaires were made in order to subjec-  
296 tively assess the individual ability to perform imaginary motor tasks, such  
297 as the Vividness of Movement Imagery Questionnaire (VMIQ) [45] or Move-  
298 ment Imagery Questionnaire (MIQ) [46]. The MIQ-3, a recent version of the  
299 MIQ, and in different of the VMIQ, assesses three kinds of imagery [47]:

- 300 a) **Internal Visual Imagery:** visual image of the performed movement  
301 from an internal perspective (i.e., the subject performing and seeing  
302 the action from a 1st person perspective).
- 303 b) **External Visual Imagery:** visual image of the performed movement  
304 from an external perspective (i.e., the subject performing and seeing  
305 the action from a from a 3rd person perspective)
- 306 c) **Kinesthetic Imagery:** creating the feeling of making the performed  
307 movement without actually doing it.

308 This survey is a 12-item questionnaire to asses the capacity to image  
309 four simple movements: a knee lift, jump, arm movement, and waist bend,  
310 in a scale from 1 (very hard) to 7 (very easy). The MIQ-3 demonstrated  
311 excellent psychometric properties, internal reliability, and predictive validity.  
312 This paper uses an adaptation of the MIQ-3 questionnaire to the Portuguese  
313 language [48].

## 314 4. Results

### 315 4.1. ERSP maps

316 Figures 3 and 4 show the time-frequency representation of significant  
317 (bootstrap method,  $p < 0.05$ ) ERD/ERS values (blue indicates ERD) for  
318 the *Hands* and *Graz* condition respectively. These maps come from a single  
319 subject (6)<sup>1</sup> at electrode positions C3, Cz, and C4. The analysis of these  
320 maps reveals, certainly, the brain activity elicited by the imagination of hands  
321 movements (motor imagery), and that the third arm emerging from the chest  
322 can elicit similar patterns.

323 For the TH task, at C3 position in *Hands* condition, a strong power de-  
324 crease is clearly visible around 500ms after stimulus onset, and this behavior  
325 repeats in almost the whole frequency range. In the other two imagery tasks,  
326 LH has a decrease in Alpha followed by an increase in Alpha and Beta. RH  
327 has a similar pattern but without a clear ERS activity in alpha. Interestingly,  
328 TH task held the ERD activity during the rest of the epoch after 1000ms  
329 with few ERS in middle and high beta bands. Conversely, in *Graz* condition  
330 at C3, the ERD patterns of the TH task are attenuated and widespread with  
331 some ERS activity at the end of the epoch in high Beta band.

332 At Cz in *Hands* condition, the TH task presents a few ERS activity that  
333 starts around 500ms in Alpha, and an ERD that starts around 1000ms in  
334 Alpha and Beta bands. LH presents a strong ERS activity in both Alpha  
335 and Beta anticipated by an ERS in Alpha and middle Beta. RH has a strong  
336 ERD activity in Alpha and Beta and posteriorly some ERS in high and low  
337 Beta. Meanwhile, in *Graz* condition, TH shows ERD patterns in Alpha until  
338 the first 1000ms. At the end of the epoch, some ERS activity is presented in  
339 high Beta. In LH, there is an ERD pattern in Alpha during the first 500ms  
340 and a widespread ERS activity later. RH holds the ERD in Alpha at the  
341 same time with some ERS in middle Beta.

342 Similarly, TH task in *Hands* condition presents an ERD pattern around  
343 500ms in Alpha and middle Beta at the C4 position. This activity is held  
344 again during the whole epoch (mainly in Alpha). Few ERS activity is found  
345 in high Beta after 1000ms. The ERS activity is most prominent in Alpha  
346 and low-middle Beta for LH, meanwhile, RH shows an ERD/ERS pattern in  
347 Alpha and Beta in the first 1000ms. For *Graz* condition, the ERD patterns

---

<sup>1</sup>In order to show visibly the phenomena, we used the EEG data from the subject who obtained the best classification rates [26].

348 of TH task are widespread in Alpha and Beta between 500ms and 1500ms  
349 with some presence of ERS in high Beta. LH has a strong ERD activity  
350 during the first 1000ms in Alpha and some widespread ERS in high Beta.  
351 RH has strong ERD patterns during the same previous time in both Alpha  
352 and middle Beta followed by a strong ERS activity in Alpha, extended along  
353 of the epoch.

#### 354 4.2. Topographical Maps

355 Figure 5 shows the representative set of topographical distributions of  
356 each mental task obtained from the same subject in Alpha and Beta bands  
357 for the first second after the cue. The TH task, for both bands in *Hands*  
358 condition only exhibits ERD activity (more prominent in Alpha band) mainly  
359 on the contralateral (C3) and middle (Cz) regions. On other hand, TH in  
360 *Graz* condition presents ERD/ERS activity in both bands; in effect, it can be  
361 seen a strong ERD on the frontal lobe (F3) and ERS on parietal region (P3).  
362 These findings could suggest that the brain activity elicited by the third arm  
363 is not only associated with sensorimotor areas, but also the imagination effort  
364 is visible at frontal and parietal regions (more clear in *Hands* condition for  
365 both bands).

#### 366 4.3. Power spectral analysis

367 In order to explore the differences of the ERD/ERS patterns among tasks  
368 in the two conditions, Figures 6 and 7 show comparisons of the power changes  
369 of the TH task against the other imagery tasks (LH-RH) in both conditions  
370 using the same electrodes array from the same subject (6). Blue lines repre-  
371 sent TH, the red ones LH while RH is represented by green lines. Moreover,  
372 Figure 8 presents the power comparison of the TH task in both conditions.  
373 Blue line indicates The paired Wilcoxon signed-rank test was used to find  
374 out significant differences between conditions ( $p < 0.05$ ). They are indicated  
375 by shaded blocks.

376 The differences presented by TH-LH and TH-RH are significantly more  
377 broad-banded at C3 than other channels in *Hands* condition (Figure 6).  
378 Meanwhile, *Graz* condition presents similar significant region sizes among the  
379 channels (Figure 7). At C3, both cases (TH-RH, TH-LH) in *Hands* condition  
380 show significant differences in almost the whole frequency range. Conversely,  
381 in *Graz* condition, TH-RH shows more significant differences in Alpha and  
382 low Beta than TH-LH, but they share the significant region around 20Hz up  
383 to 25Hz.

384 At Cz in *Hands* condition, the TH-LH comparison does not have a sig-  
385 nificant region in the Alpha band, but it shares a low and middle Beta with  
386 TH-RH, which has significant differences in Alpha and high Beta sub-bands.  
387 For the *Graz* condition in the same location, the TH-LH comparison indi-  
388 cates wide-spread sub-band regions for the Beta, in Alpha only a small region  
389 around 10hz is presented and, in the meantime, TH-RH shows a consistent  
390 region in Alpha and low and high Beta.

391 Finally, at C4 in *Hands*, the TH-RH comparison shows wider regions than  
392 TH-LH, especially in Alpha and middle Beta rhythms. The same behavior is  
393 presented in the *Graz* condition, where TH-RH has more significant regions  
394 in Alpha and low and middle Beta than TH-LH, which does not have a  
395 significant difference in Alpha, only in several sub-bands along Beta, mainly  
396 above than 15Hz.

397 In the comparison of the TH task between conditions (Figure 8), there is  
398 a stronger power decrease in *Hands* than in *Graz* condition, in line with the  
399 ERS/ERD maps (Figures 3 and 4). Such difference is more evident at C3  
400 than the other channels. Likewise, C3 noticeably shows significant regions  
401 within both Alpha and Beta rhythms, whereas Cz is more often in middle  
402 and high beta, and C4 in Alpha and middle Beta.

#### 403 4.4. Cognitive Load and MIQ results

404 Figure 9 shows the cognitive load of both objective (Task Load Index)  
405 and subjective (NASA-TLX) analyzes. The results from the cognitive load  
406 assessed by the Task Load Index show that the *Hands* condition has a sig-  
407 nificantly higher cognitive load than the *Graz* one (pairwise paired Wilcox  
408 with Bonferroni:  $V = 656$ ,  $p\text{-value} = 0.00063$ ). There is no significant dif-  
409 ference among the imaginary tasks (TH,RH, LH) and resting state (RS).  
410 Meanwhile, the subjective assessment of the cognitive load reflects the oppo-  
411 site. NASA Workload points to a higher cognitive load in the *Graz* condition  
412 instead, although significance could not be found (paired t-test:  $t=0.829$ ,  $p\text{-}$   
413  $\text{value}=0.428$ ).

414 Figure 10 shows that the *Hands* condition presents a non-significant  
415 higher Load Magnitude than *Graz* in factors such as Performance, Physi-  
416 cal and Temporal demand. Nevertheless, a pairwise paired Wilcoxon reflects  
417 that there is a significant difference between conditions in the Frustration  
418 factor ( $V=210$ ,  $p\text{-value}= 0.049$ ), indicating a higher sense of frustration in  
419 *Graz* than *Hands* condition.

420 Finally, a study about the difficulty of performing imaginary tasks was  
421 carried out through the Mental Imaginary Questionnaire (MIQ-3). Figure  
422 11 summarizes the user's answers of the MIQ-3 questionnaire, the ratings  
423 represent how easy (7) or hard (1) was to perform the imagery task. The  
424 mean values show that External Visual Imagery ( $5 \pm 1.02$ ) was easier for  
425 the users than Internal Visual Imagery ( $4.8 \pm 1.13$ ) and Kinesthetic Imagery  
426 ( $3.95 \pm 1.24$ ).

## 427 5. Discussion

428 This study proposed the inclusion of a third arm in an MI-BCI application  
429 creating thus a supernumerary limb MI-BCI system. Furthermore, for this  
430 approach, the influence of embodiment feedback (*Hands*) was compared with  
431 the standard Graz training in VR. In line with the previous works [34, 35, 26],  
432 both the classification rates and the modulation of ERD/ERS signals were  
433 enhanced by the realistic feedback, evidencing its importance inside the BCI  
434 loop. Also, our work goes further than the one done by Skola and Liarnokapis  
435 [34] because they compared an embodied VR scenario against a monitor-  
436 based Graz, creating a bias in the users who started with VR. Here, the  
437 comparison was made with both Graz and Hands experimental conditions  
438 performed in immersive VR.

439 The presented patterns (Figures 3 and 4) suggest a significantly decreased  
440 activity in the sensorimotor area caused by the realistic feedback in compar-  
441 ison with the conventional paradigm (*Graz*). Besides this, the ERD activity  
442 of TH task is prominent at the three sensorimotor channels (C3, Cz C4)  
443 which could suggest that there is not a compulsory hemisphere governing  
444 the control and action of the imaginary third arm. Nevertheless, the analysis  
445 of the power changes between tasks (Figures 6 and 7) shows that there are  
446 more significant regions at C3 than at the other electrode positions. This  
447 result could indicate that the user's handedness influences the region where  
448 TH task presents more activity. In the same way, the common ERD/ERS  
449 pattern is visible in LH and RH tasks, more in RH than LH; but it was miss-  
450 ing in TH (only an increasing power activity was found in higher frequencies:  
451  $> 25Hz$ ). It could suggest that the absence of symmetry of the third arm  
452 does not elicit a supplementary ERS activity for this task, and this fact is  
453 visible in the topographical maps (Figure 5) where the TH in *Hands* condi-  
454 tion presents only ERD activity. This could indicate an effect of the virtual  
455 arms support the users to create the abstraction of the third arm. Moreover,

456 the unexpected activities presented in the resting state (RS) could be caused  
457 by the inertia of the execution/imagery movements. The paradigm to be  
458 adopted in the future should include a blank space between the motor task  
459 and resting state so that the movements could be easily excluded.

460 The aim of studying the cognitive load in both subjective and objective  
461 ways is for a deeper understanding of the additional load that realistic and  
462 visual feedback could cause. In effect, the outcome of the objective assess-  
463 ment (Task Load Index) is not supported by the results of the subjective  
464 one (NASA-TLX). EEG data reveals that the cognitive load is higher (sig-  
465 nificantly) in the realistic condition (*Hands*) than the standard one (*Graz*)  
466 but the opposite seems to occur in the NASA-TLX (without significance).  
467 Moreover, some user’s comments at the end of the experiment, such as “I  
468 found harder the arrows than the arms” or “I feel Temporal demand a bit  
469 easier in Hands than Graz because it is easier to visualize” and the opposite  
470 “... The arrow session was a easier than the virtual hands because with the  
471 arms I constantly tried to follow the hand movements which did not hap-  
472 pen with the arrows” could evidence the disjunctive sensation of the users  
473 evidenced by the NASA and Task Load Index. Interestingly, a user did the  
474 next comment “The fact that I had the possibility of performing real hand  
475 movement helped me to release the stress created by the imagery tasks.” This  
476 comment supports our decision of keeping the real movements alongside of  
477 the imaginary ones, but further studies and comparisons are necessary be-  
478 fore drawing conclusions. Finally, the imagery questionnaire shows that the  
479 External Visual Imagery was more natural to the users, complementing the  
480 comments of the users.

## 481 **6. Conclusion and Future work**

482 This study investigated the possibility of using an imaginary third arm  
483 in a BCI system, and shows the differences of the EEG patterns of using a  
484 realistic visual training in comparison of the traditional visualization. Ini-  
485 tially, the common EEG patterns of motor imagery activity (ERD/ERS) are  
486 found when the subjects were asked to imagine a hand movement of a third  
487 arm emerging from the chest. These findings can suggest that the illusion of  
488 having a third arm could go further than a Rubber Hand illusion since, in  
489 this case, a limb is attached and included rather than replaced as RHI does.

490 In line with the discussion above, the visual processing plays a vital role in  
491 the task load. Despite the *Hands* condition was kept as simple as possible, it

492 could not be possible to maintain a low cognitive load like in *Graz*. In effect,  
493 the processing of visual animation is higher than arrows and fixation cross,  
494 showing how the visual processing plays a vital role in the task load. However,  
495 the benefits presented by this feedback are reflected in the enhancement of  
496 the ERD/ERS signals that consequently produces an improvement in the  
497 classification. Supernumerary MI-BCI systems are prominent and possible  
498 uses should be explored, especially for VR applications, where customized  
499 avatars could be controlled using imaginary non-body signals. In effect, Abdi  
500 et al. [49] provide evidences about the usefulness and preferences of having  
501 three hands in the execution of some activities (i.e. catching objects).

502 Additionally, and in line with the previous findings done by Skola and  
503 Liarnokapis [34], the embodied training improves the classification perfor-  
504 mance as well as it elicits stronger and consistent ERS/ERD patterns than  
505 the traditional *Graz* paradigm. However, such comparison, unlike that by  
506 Skola and Liarnokapis, is done in VR, i.e.; both conditions were made in an  
507 immersive VR scenario, eliminating the bias that exists when the comparison  
508 is made with *Graz* in a monitor-based presentation.

509 An interesting approach would be studying the sense of agency and own-  
510 ership of the virtual third-arm using both questionnaires or galvanic skin  
511 response (GSR), as done by Bashford and Mehring Bashford and Mehring  
512 [38]. This would provide a wider body of knowledge about the use of a su-  
513 pernumerary BCI system. Besides this, an online experiment is mandatory  
514 to validate the initial results as well as studies about the handedness of the  
515 third arm using left-handed subjects.

516 Finally, this work also intends to provide premises regarding the role of  
517 mental imagery in the exploration of cognitive processes. If we look at the  
518 present work from the perspective of embodied cognition, we can argue that  
519 supernumerary BCI systems can allow us to study the human ability for body  
520 extrapolation and how the mind can be shaped by these new experiences. A  
521 discussion is open towards the use of imaginary limbs as a means to control  
522 system, extending the human mind constraints imposed by the body.

## 523 **7. Acknowledgements**

524 This study was partly funded by the Coordenação de Aperfeiçoamento de  
525 Pessoal de Nível Superior - Brasil (CAPES) - Finance Code 001, and partly  
526 by CNPq. We also acknowledge FAPERGS (project 17/2551-0001192-9) and  
527 CNPq-Brazil (project 311353/2017-7) for their financial support. Special



528 thanks are also due to Petrobras for the support through the Annelida re-  
529 search project. The first author would like to thank to the SDAS Research  
530 Group ([www.sdas-group.com](http://www.sdas-group.com)) for its valuable support.

## 531 References

- 532 [1] C. Neuper, G. Muller, A. Kubler, N. Birbaumer, G. Pfurtscheller, Clin-  
533 ical application of an eeg-based brain-computer interface: a case study  
534 in a patient with severe motor impairment, *Clinical Neurophysiology*  
535 114 (2003) 399 – 409.
- 536 [2] C. Neuper, G. Pfurtscheller, *Neurofeedback Training for BCI Control*,  
537 Springer Berlin Heidelberg, Berlin, Heidelberg, pp. 65–78.
- 538 [3] T. O. Zander, C. Kothe, Towards passive braincomputer interfaces:  
539 applying braincomputer interface technology to humanmachine systems  
540 in general, *Journal of Neural Engineering* 8 (2011) 025005.
- 541 [4] T. O. Zander, C. Kothe, S. Jatzev, M. Gaertner, *Enhancing Human-*  
542 *Computer Interaction with Input from Active and Passive Brain-*  
543 *Computer Interfaces*, Springer London, London, pp. 181–199.
- 544 [5] T. O. Zander, M. Gaertner, C. Kothe, R. Vilimek, Combining eye  
545 gaze input with a braincomputer interface for touchless humancomputer  
546 interaction, *International Journal of HumanComputer Interaction* 27  
547 (2010) 38–51.
- 548 [6] E. Donchin, K. M. Spencer, R. Wijesinghe, The mental prosthesis:  
549 assessing the speed of a p300-based brain-computer interface, *IEEE*  
550 *Transactions on Rehabilitation Engineering* 8 (2000) 174–179.
- 551 [7] M. Jeannerod, Mental imagery in the motor context, *Neuropsychologia*  
552 33 (1995) 1419 – 1432. *The Neuropsychology of Mental Imagery*.
- 553 [8] J. R. Wolpaw, N. Birbaumer, D. J. McFarland, G. Pfurtscheller, T. M.  
554 Vaughan, Braincomputer interfaces for communication and control,  
555 *Clinical Neurophysiology* 113 (2002) 767 – 791.
- 556 [9] G. Pfurtscheller, C. Neuper, Motor imagery and direct brain-computer  
557 communication, *Proceedings of the IEEE* 89 (2001) 1123–1134.

- 558 [10] P. Gert, R. Leeb, J. Faller, C. Neuper, Brain-computer interface systems  
559 used for virtual reality control, in: J.-J. Kim (Ed.), *Virtual Reality*,  
560 InTech, 2011, pp. 1–19.
- 561 [11] R. Chavarriaga, M. Fried-Oken, S. Kleih, F. Lotte, R. Scherer, Heading  
562 for new shores! overcoming pitfalls in bci design, *Brain Computer*  
563 *Interfaces* (Abingdon, England) 4 (2017) 60–73.
- 564 [12] F. Lotte, L. Bougrain, A. Cichocki, M. Clerc, M. Congedo, A. Rako-  
565 tomamonjy, F. Yger, A review of classification algorithms for eeg-based  
566 braincomputer interfaces: a 10 year update, *Journal of Neural Engi-*  
567 *neering* 15 (2018) 031005.
- 568 [13] F. Lotte, C. Jeunet, Defining and quantifying users’ mental imagery-  
569 based BCI skills: a first step, *Journal of Neural Engineering* 15 (2018)  
570 046030.
- 571 [14] F. Lotte, C. Jeunet, Online classification accuracy is a poor metric to  
572 study mental imagery-based bci user learning: an experimental demon-  
573 stration and new metrics , in: *7th International BCI Conference*, Graz,  
574 Austria.
- 575 [15] F. Lotte, C. Jeunet, J. Mladenovic, B. N’Kaoua, L. Pillette, A BCI  
576 challenge for the signal processing community: considering the user in  
577 the loop, in: *Signal Processing and Machine Learning for Brain-Machine*  
578 *Interfaces*, IET, 2018, pp. 1–33. Chapter 8.
- 579 [16] A. HA, Virtual reality programs applications in healthcare, *Health Med*  
580 *Informat* 9 (2018) 305.
- 581 [17] C. Donalek, S. G. Djorgovski, A. Cioc, A. Wang, J. Zhang, E. Lawler,  
582 S. Yeh, A. Mahabal, M. Graham, A. Drake, S. Davidoff, J. S. Norris,  
583 G. Longo, Immersive and collaborative data visualization using virtual  
584 reality platforms, in: *2014 IEEE International Conference on Big Data*  
585 *(Big Data)*, pp. 609–614.
- 586 [18] P. Gamito, J. Oliveira, C. Coelho, D. Morais, P. Lopes, J. Pacheco,  
587 R. Brito, F. Soares, N. Santos, A. F. Barata, Cognitive training on  
588 stroke patients via virtual reality-based serious games, *Disability and*  
589 *Rehabilitation* 39 (2017) 385–388.

- 590 [19] A. Lcuyer, F. Lotte, R. B. Reilly, R. Leeb, M. Hirose, M. Slater, Brain-  
591 computer interfaces, virtual reality, and videogames, *Computer* 41  
592 (2008) 66–72.
- 593 [20] E. C. Lalor, S. P. Kelly, C. Finucane, R. Burke, R. Smith, R. B. Reilly,  
594 G. McDarby, Steady-state vep-based brain-computer interface control in  
595 an immersive 3d gaming environment, *EURASIP Journal on Advances*  
596 *in Signal Processing* 2005 (2005) 706906.
- 597 [21] R. Leeb, D. Friedman, G. R. Mller-Putz, R. Scherer, M. Slater,  
598 G. Pfurtscheller, Self-paced (asynchronous) bci control of a wheelchair  
599 in virtual environments: A case study with a tetraplegic, *Computational*  
600 *Intelligence and Neuroscience* 79642 (2007).
- 601 [22] F. Lotte, Y. Renard, A. Lécuyer, Self-Paced Brain-Computer Interaction  
602 with Virtual Worlds: A Quantitative and Qualitative Study “Out of the  
603 Lab”, in: 4th international Brain Computer Interface Workshop and  
604 Training Course, Graz University of Technology, Graz, Austria.
- 605 [23] M. Botvinick, J. Cohen, Rubber hands feel touch that eyes see, *Nature*  
606 391 (1998) 756 EP –.
- 607 [24] F. Ferri, A. M. Chiarelli, A. Merla, V. Gallese, M. Costantini, The  
608 body beyond the body: expectation of a sensory event is enough to  
609 induce ownership over a fake hand, *Proceedings of the Royal Society B:*  
610 *Biological Sciences* 280 (2013) 20131140.
- 611 [25] A. Kalckert, H. Ehrsson, Moving a rubber hand that feels like your  
612 own: A dissociation of ownership and agency, *Frontiers in Human Neu-*  
613 *roscience* 6 (2012) 40.
- 614 [26] J. Riascos, S. Villa, A. Maciel, L. Nedel, D. Barone, Towards moving  
615 virtual arms using brain-computer interface, in: M. Gavrilova, J. Chang,  
616 N. M. Thalmann, E. Hitzler, H. Ishikawa (Eds.), *Advances in Computer*  
617 *Graphics*, Springer International Publishing, Cham, 2019, pp. 445–452.
- 618 [27] S. G. Hart, L. E. Stavenland, Development of NASA-TLX (Task Load  
619 Index): Results of empirical and theoretical research, in: P. A. Hancock,  
620 N. Meshkati (Eds.), *Human Mental Workload*, Elsevier, 1988, pp. 139–  
621 183.

- 622 [28] M. E. Smith, A. Gevins, H. Brown, A. Karnik, R. Du, Monitoring  
623 task loading with multivariate eeg measures during complex forms of  
624 human-computer interaction, *Human Factors* 43 (2001) 366–380.
- 625 [29] P. Mendes, D. A. Marinho, J. Petrica, P. Silveira, D. Monteiro, L. Cid,  
626 Translation and validation of the movement imagery questionnaire 3  
627 (miq - 3) with portuguese athletes, *Motricidade* 12 (2016) 149.
- 628 [30] C. Neuper, G. Pfurtscheller, *Neurofeedback Training for BCI Control*,  
629 Springer Berlin Heidelberg, Berlin, Heidelberg, pp. 65–78.
- 630 [31] F. Lotte, J. Faller, C. Guger, Y. Renard, G. Pfurtscheller, A. Lécuyer,  
631 R. Leeb, Combining BCI with Virtual Reality: Towards New Appli-  
632 cations and Improved BCI, in: B. Z. Allison, S. Dunne, R. Leeb,  
633 J. D. R. Millán, A. Nijholt (Eds.), *Towards Practical Brain-Computer*  
634 *Interfaces*, Springer, 2013.
- 635 [32] C. Neuper, R. Scherer, S. Wriessnegger, G. Pfurtscheller, Motor imagery  
636 and action observation: Modulation of sensorimotor brain rhythms dur-  
637 ing mental control of a brain-computer interface, *Clinical Neurophysi-*  
638 *ology* 120 (2009) 239 – 247.
- 639 [33] R. Ron-Angevin, A. Diaz-Estrella, Brain-computer interface: Changes  
640 in performance using virtual reality techniques, *Neuroscience Letters*  
641 449 (2009) 123 – 127.
- 642 [34] F. Skola, F. Liarokapis, Embodied vr environment facilitates motor-  
643 imagery brain-computer interface training, *Computers and Graphics* 75  
644 (2018) 59 – 71.
- 645 [35] N. Braun, R. Emkes, J. D. Thorne, S. Debener, Embodied neurofeed-  
646 back with an anthropomorphic robotic hand, *Scientific Reports* 6 (2016)  
647 37696 EP –. Article.
- 648 [36] M. Alimardani, S. Nishio, H. Ishiguro, Effect of biased feedback on  
649 motor imagery learning in bci-teleoperation system, *Frontiers in Systems*  
650 *Neuroscience* 8 (2014) 52.
- 651 [37] M. Alimardani, S. Nishio, H. Ishiguro, Removal of proprioception by  
652 bci raises a stronger body ownership illusion in control of a humanlike  
653 robot, *Scientific Reports* 6 (2016) 33514 EP –. Article.

- 654 [38] L. Bashford, C. Mehring, Ownership and agency of an independent  
655 supernumerary hand induced by an imitation brain-computer interface,  
656 PLOS ONE 11 (2016) 1–15.
- 657 [39] M. Song, J. Kim, A paradigm to enhance motor imagery using rubber  
658 hand illusion induced by visuo-tactile stimulus, IEEE Transactions on  
659 Neural Systems and Rehabilitation Engineering 27 (2019) 477–486.
- 660 [40] C. Neuper, R. Scherer, M. Reiner, G. Pfurtscheller, Imagery of mo-  
661 tor actions: Differential effects of kinesthetic and visualmotor mode of  
662 imagery in single-trial eeg, Cognitive Brain Research 25 (2005) 668 –  
663 677.
- 664 [41] M. xflexx, Lsl4unity: A integration approach of the labstreaminglayer  
665 framework for unity3d, 2019.
- 666 [42] A. Delorme, S. Makeig, Eeglab: an open source toolbox for analysis  
667 of single-trial eeg dynamics including independent component analysis,  
668 Journal of Neuroscience Methods 134 (2004) 9 – 21.
- 669 [43] R. Leeb, C. Keinrath, D. Friedman, C. Guger, R. Scherer, C. Neuper,  
670 M. Garau, A. Antley, A. Steed, M. Slater, G. Pfurtscheller, Walking  
671 by thinking: The brainwaves are crucial, not the muscles!, Presence 15  
672 (2006) 500–514.
- 673 [44] A. Delorme, S. Makeig, Eeglab: an open source toolbox for analysis  
674 of single-trial eeg dynamics including independent component analysis,  
675 Journal of Neuroscience Methods 134 (2004) 9 – 21.
- 676 [45] R. Roberts, N. Callow, L. Hardy, D. Markland, J. Bringer, Movement  
677 imagery ability: Development and assessment of a revised version of  
678 the vividness of movement imagery questionnaire, Journal of sport and  
679 exercise psychology 30 (2008) 200–21.
- 680 [46] F. Atienza, I. Balaguer, M. L. Garcia-Merita, Factor analysis and reli-  
681 ability of the movement imagery questionnaire, Perceptual and Motor  
682 Skills 78 (1994) 1323–1328.
- 683 [47] S. Williams, J. Cumming, N. Ntoumanis, S. M Nordin-Bates, R. Ram-  
684 sey, C. Hall, Further validation and development of the movement im-  
685 agery questionnaire, Journal of sport and exercise psychology 34 (2012)  
686 621–46.

- 687 [48] P. A. Mendes, D. A. Marinho, J. D. Petrica, P. Silveira, D. Monteiro,  
688 L. Cid, Traduo e validao do movement imagery questionnaire - 3 (miq  
689 - 3) com atletas portuguesas, Motricidade 12 (2016) 149 – 158.
- 690 [49] E. Abdi, E. Burdet, M. Bouri, S. Himidan, H. Bleuler, In a demanding  
691 task, three-handed manipulation is preferred to two-handed manipula-  
692 tion, Scientific Reports 6 (2016) 21758 EP –. Article.

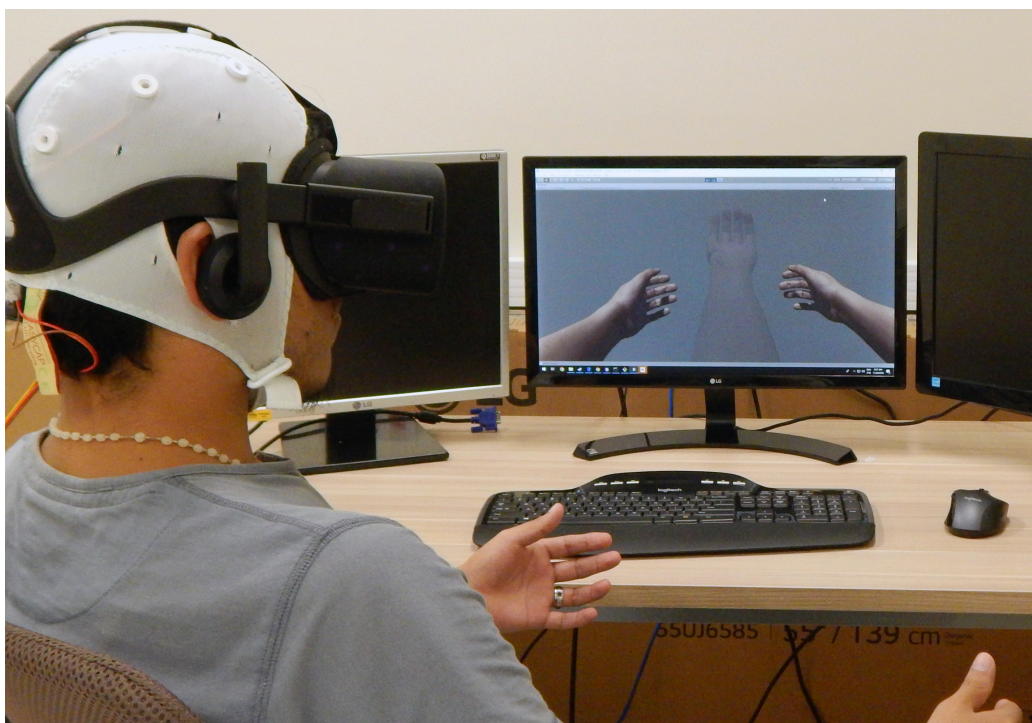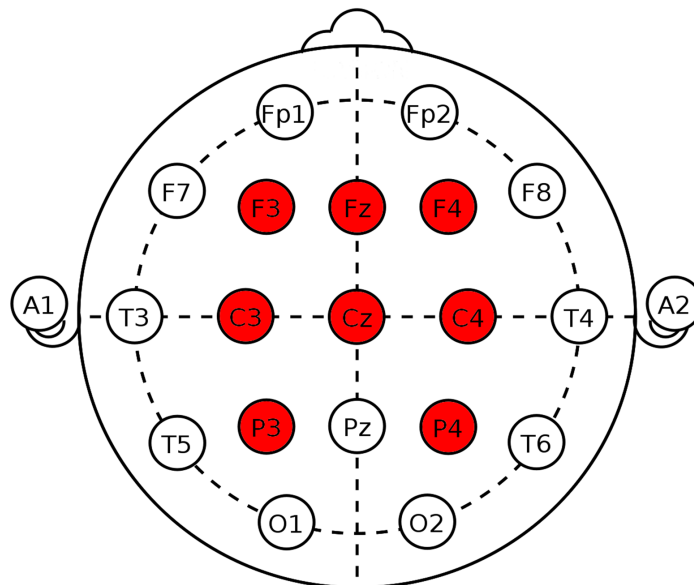

Figure 1: Experiment setup: A subject using a BCI interface to control his “three” arms in a virtual reality experience (top); and the electrodes placement over the sensorimotor area (filled circle), following the 10-20 system (bottom).

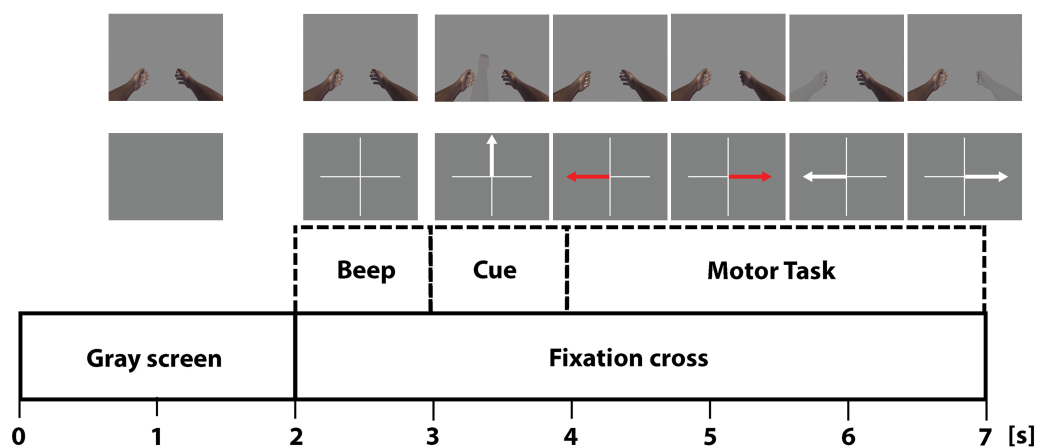

Figure 2: Experiment paradigm. The visual stimulus of the task's cue are corresponding for both conditions. Top: visual stimuli for *Hands* condition. Middle: visual stimuli for *Graz* condition. Bottom: timing of the trials following the classic Graz protocol.



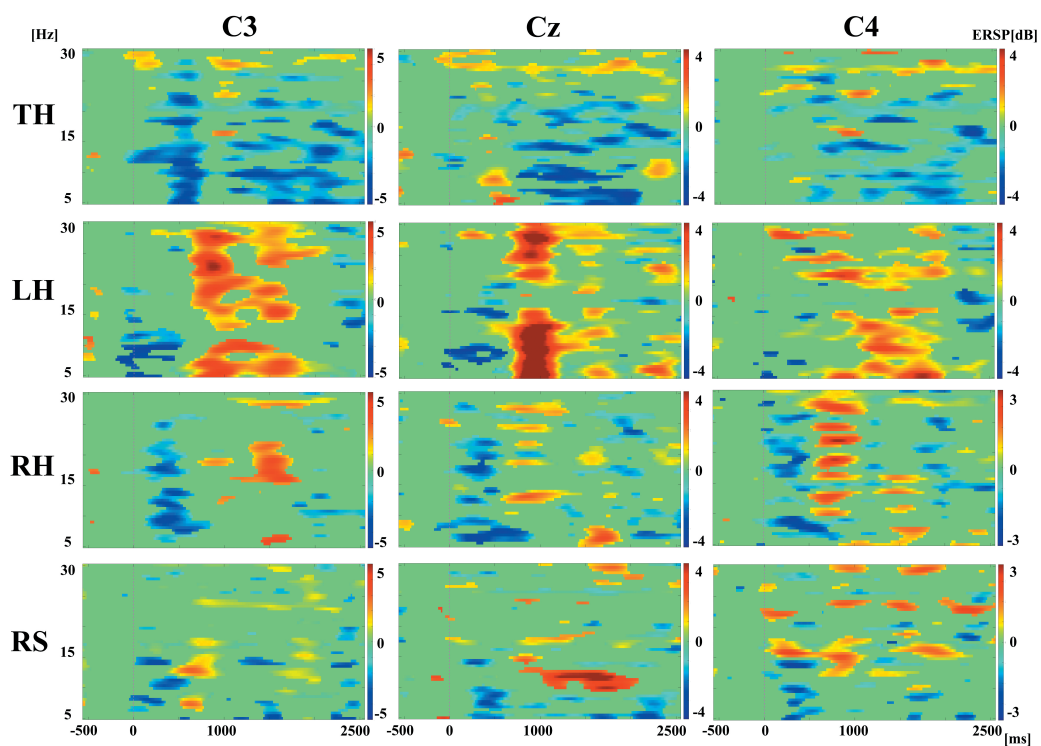

Figure 3: Significant ERD/ERS patterns of the mental task at C3, Cz, C4 positions for *Hands* condition (blue indicates ERD). A strong ERD activity is found at the three electrodes for the third hand (TH). Whereas, ERS patterns are found mainly for the left hand (LH). The ERD/ERS fluctuation is more visible for the right hand (RH), mostly at C4.

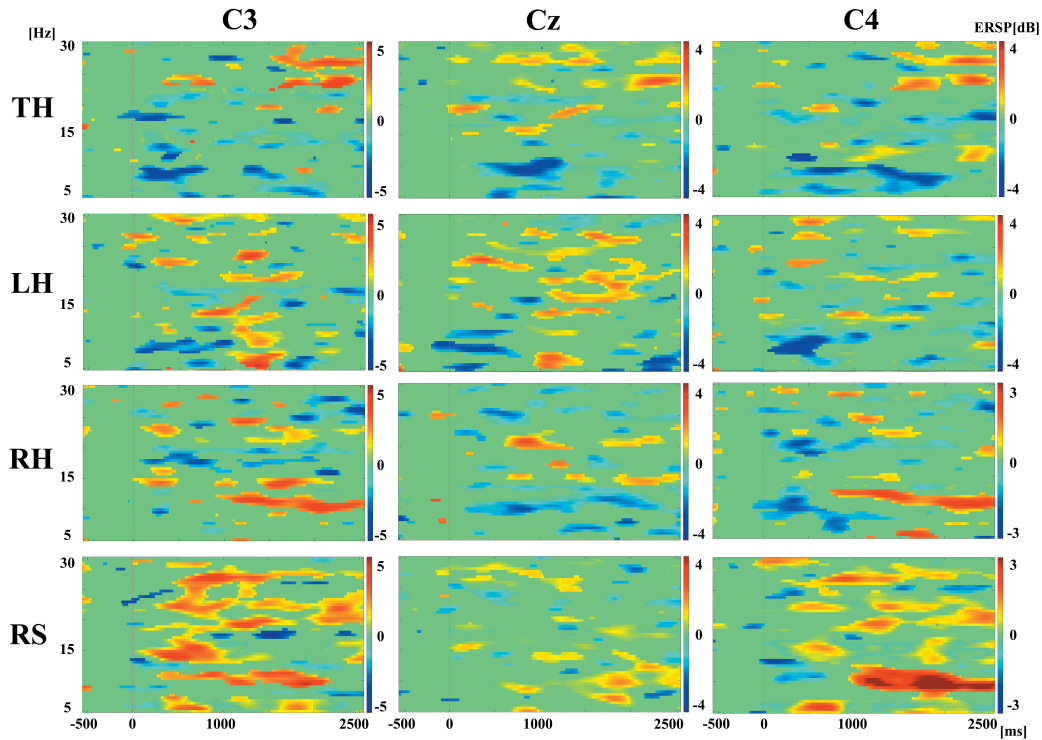

Figure 4: Significant ERD/ERS patterns of the mental task at C3, Cz, C4 positions for *Graz* condition (blue indicates ERD). An ERD activity is mainly found in the alpha band (8-12 Hz) at the three electrodes for the third hand (TH). The ERD/ERS patterns are widespread for left and right hands (LH, RH respectively) at the three electrodes. There is extensive activity in the resting state (RS).

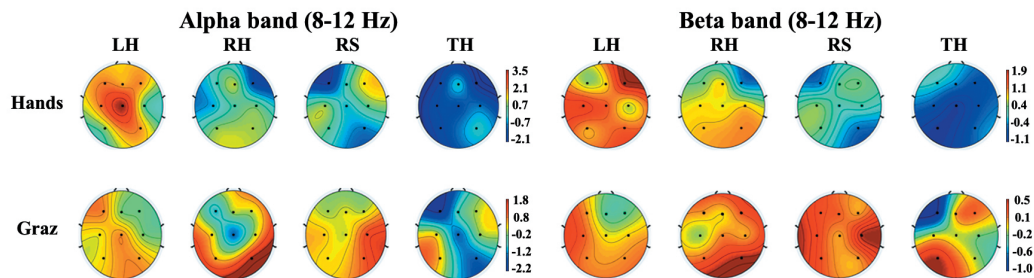

Figure 5: Topographical distribution of each task for both conditions (blue indicates ERD). The maps are made using the ERSP values in both Alpha and Beta bands, one second after the cue. Blue indicates the ERD activity during the mental tasks.

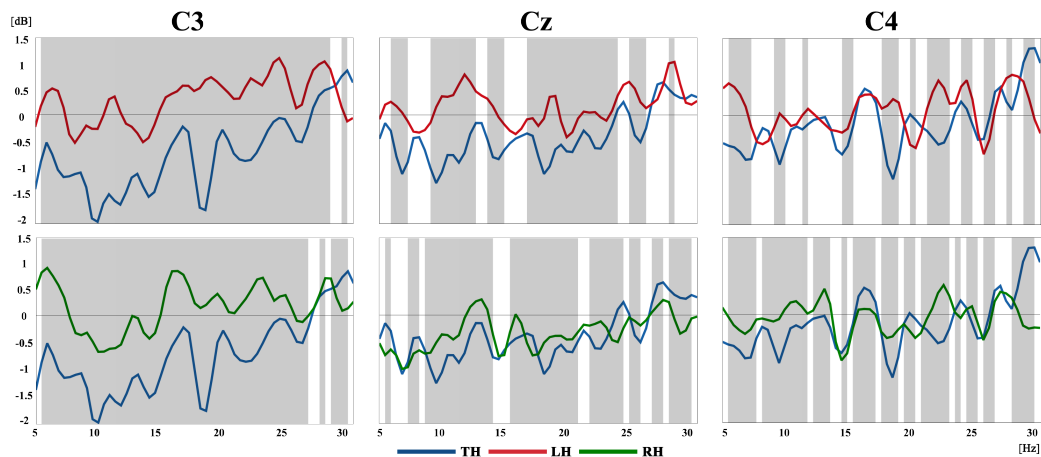

Figure 6: Comparison of the power changes of the mental tasks in the sensory-motor area (C3, Cz, C4) in *Hands* condition. Top: Third hand (TH, blue) - Left hand (LH, red). Bottom: Third hand (TH, blue) - Right hand (RH, red).

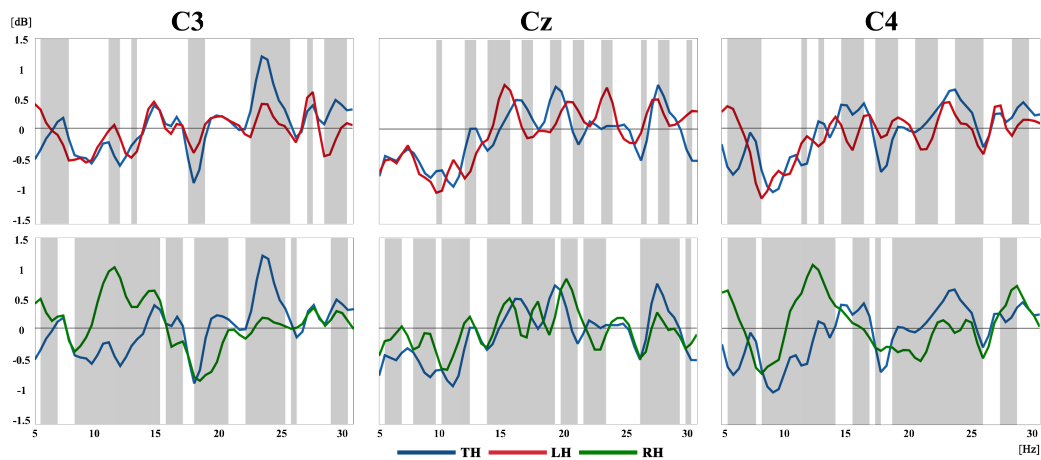

Figure 7: Comparison of the power changes of the mental tasks in the sensory-motor area (C3, Cz, C4) in *Graz* condition. Top: Third hand (TH, blue) - Left hand (LH, red). Bottom: Third hand (TH, blue) - Right hand (RH, red).

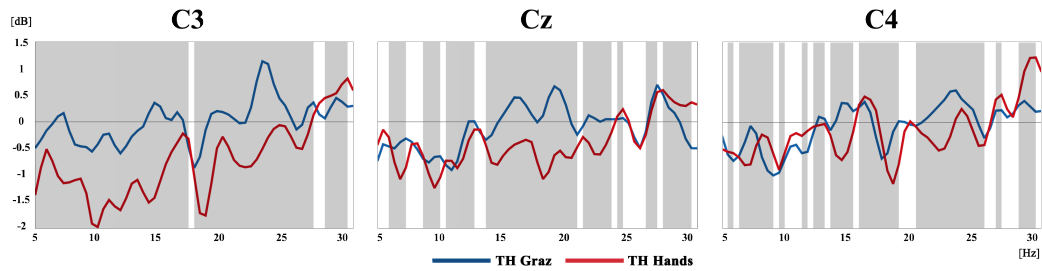

Figure 8: Comparison of the power changes of the third arm task in the sensory-motor area (C3, Cz, C4) for both conditions. Blue: Third hand in *Graz* condition. Red: Third hand in *Hands* condition.

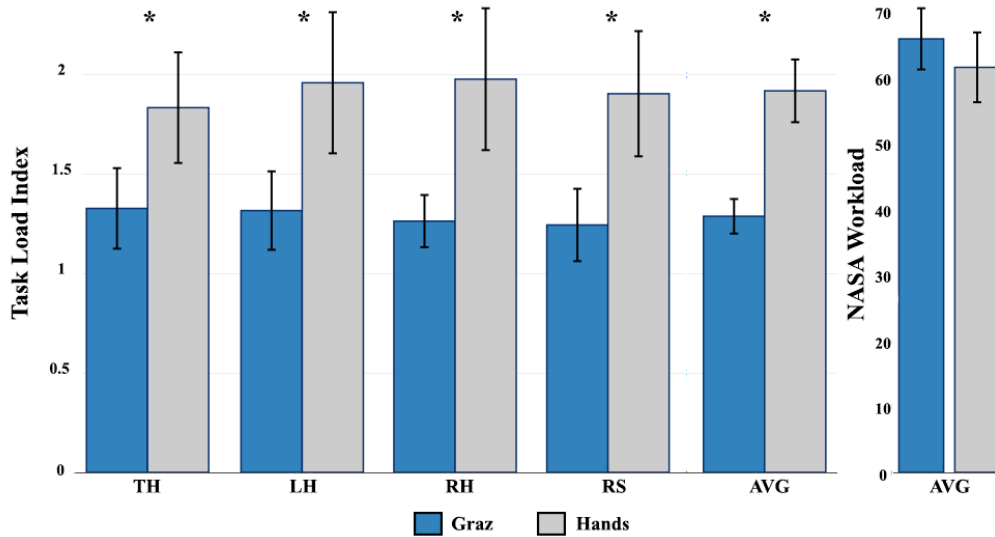

Figure 9: Task Load Index and NASA Workload assessment for the two conditions. \* Significant differences

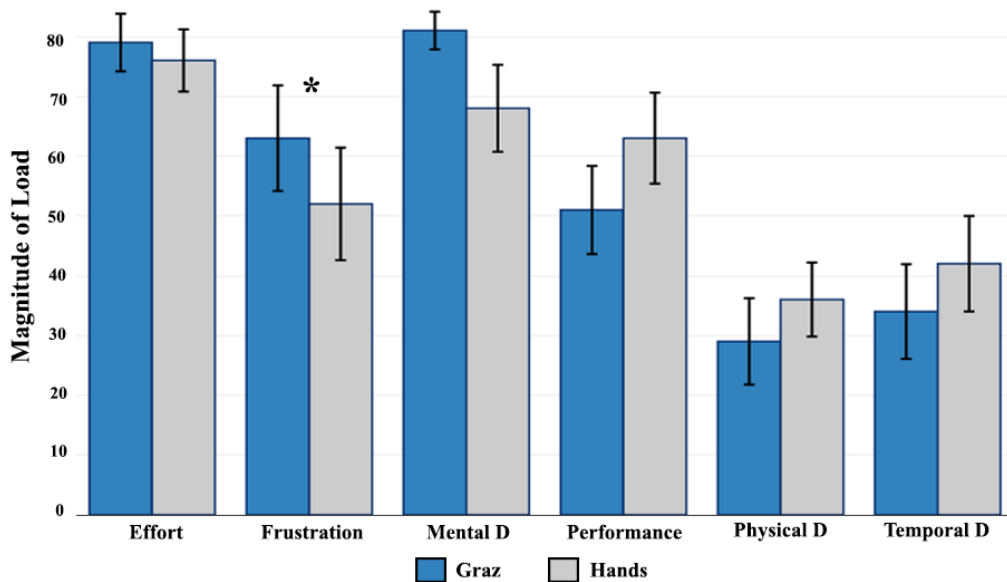

Figure 10: NASA factors for the two conditions. \*Significant difference.

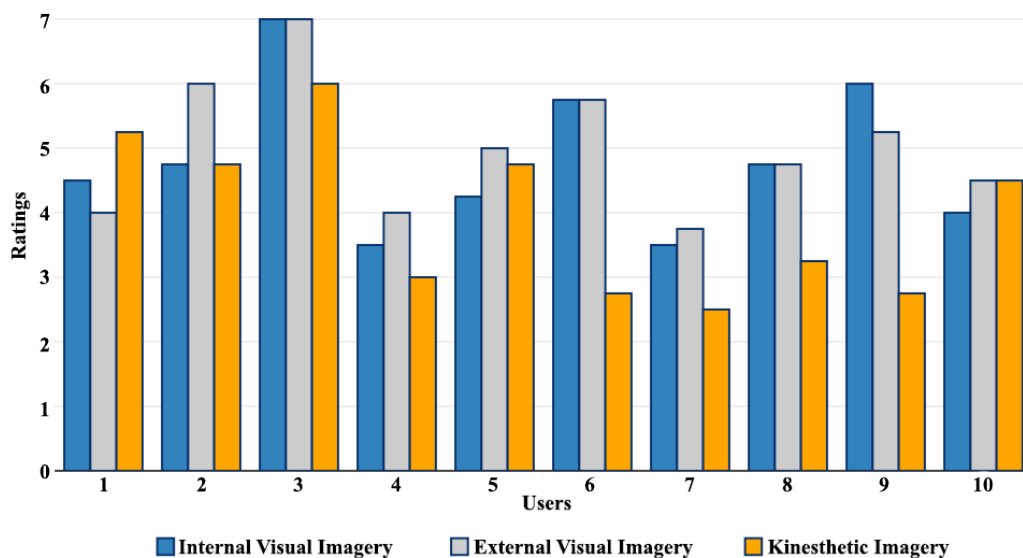

Figure 11: MIQ-3 results. Ratings range from 1 (very hard) to 7 (very easy).
